# Supplementary material for: Impact of the Composite Allocation Score on Lung Transplant Waitlist and Post- Transplant Outcomes
Source: Research Square preprint supplement (doi:10.21203/rs.3.rs-6448565/v1), 2025-04-23
Supplement: Supplementary file 1 [file 08c3b733714f58bd1c060e19.docx]

**Supplemental Materials:**

**Table S1.** Outcomes of competing risks for patients on the waitlist by CAS implementation era.

| **Variables** | **Competing risk of death or deterioration**  **(N = 1,169)** | | | **Competing risk of transplant**  **(N = 6,398)** | | | **Competing risk of recovery**  **(N = 265)** | | |
| --- | --- | --- | --- | --- | --- | --- | --- | --- | --- |
| **aSHR** | **95% CI** | ***P Value*** | **aSHR** | **95% CI** | ***P Value*** | **aSHR** | **95% CI** | ***P Value*** |
| **Era 2 (Era 1 as reference)** | 0.73 | 0.65-0.82 | ***<.0001*** | 1.05 | 1.01-1.08 | ***0.005*** | 0.46 | 0.36-0.59 | ***<.0001*** |

**Table S2.** Waitlist mortality of lung transplant candidates compared before and after the CAS policy change.

| **Variables** | **Total**  **(N = 10,076)** | **Era 1**  **(N = 4,382)** | **Era 2**  **(N = 5,694)** | ***P-Value*** |
| --- | --- | --- | --- | --- |
| **Waitlist Mortality, N (%)** |  |  |  |  |
| Overall | 1,169 (11.6%) | 609 (13.9%) | 560 (9.8%) | ***<.0001*** |
| 30 Days | 497 (4.9%) | 239 (5.5%) | 258 (4.5%) | ***0.004*** |
| 90 Days | 839 (8.3%) | 404 (9.2%) | 435 (7.6%) | ***0.001*** |
| 6 Months | 975 (9.7%) | 471 (10.8%) | 504 (8.9%) | ***<.0001*** |
| 1 Year | 1,090 (10.8%) | 538 (12.3%) | 552 (9.7%) | ***<.0001*** |
